# Supplementary material
Source: PubMed Central journal article supplement (PMC4670084)
Supplement: NIHMS645780-supplement.pdf [file NIHMS645780-supplement.pdf]

Neurons can be labeled with unique hues by helper virus-free HSV-1 vectors expressing Brainbow

Guo-rong Zhang, Hua Zhao, Haiyan Cao, Xu Li, and Alfred I. Geller

**Supporting Figure S1. Sequence of the brainbow cassette in HSV-brainbow.**

5'

GGCGCGCCGGTTCAGTTTAAACATAACTTCGTATAGCATACATTATACGAAGTTATACCATGCTGT  
GCTGTATGAGAAGAACCAACAGGTTGAAAAGAATGATGAGGACCAAAGATTGAACAAATGGTG  
AGCAAGGGCGAGGAGCTGTTACCGGGGTGGTGCCATCCTGGTTCGAGCTGGACGGCGACGTA  
AACGGCCACAAGTTCAGCGTGTCCGGCGAGGGCGAGGGCGATGCCACCTACGGCAAGCTGACC  
CTGAAGTTCATCTGCACCACCGGCAAGCTGCCCGTGCCCTGGCCCACCCTCGTGACCACCTTCA  
CCTACGGCGTGCAGTGCTTCGCCCGCTACCCCGACCACATGAAGCAGCAGACTTCTTCAAGTC  
CGCCATGCCCGAAGGCTACGTCCAGGAGCGCACCATCTTCTTCAAGGACGACGGCAACTACAAG  
ACCCGCGCCGAGGTGAAGTTCGAGGGCGACACCCTGGTGAACCGCATCGAGCTGAAGGGCATC  
GACTTCAAGGAGGACGGCAACATCCTGGGGCACAAGCTGGAGTACAACACTACAACAGCCACAAGG  
TCTATATCACCGCCGACAAGCAGAAGAACGGCATCAAGGTGAACCTCAAGACCCGCCACAACAT  
CGAGGACGGCAGCGTGCAGCTCGCCGACCACTACCAGCAGAACACCCCCATCGGGCGACGGCCC  
CGTGCTGCTGCCCGACAACCACTACCTGAGCACCCAGTCCGCCCTGAGCAAAGACCCCAACGA  
GAAGCGCGATCACATGGTCCTGCTGGAGTTCGTGACCGCCGCGGGATCACTCTCGGCATGGA  
CGAGCTGTACAAGTAAACCGTGCTGACCTCCAAGTACCGTTAAGCTGCCTTCTGCGGGGCTTGC  
CTTCTGGCCATGCCCTTCTTCTCTCCCTTGACCTGTACCTCTTGGTCTTTGAATAAAGCCTGAGT  
AGGAAGAAGCCTGCATGCCTGGTTCTCTGCGTCTGCAAAGGTGTCATGTTTAGTGTGGGGATGC  
CGCAGCTCATTGCCATGGGGCAGTAAAGACAAGTTTCAGAGCAAAAAGCATAATTGGATGCCAT  
CGATGCTGCCGCGGCATAGAGCCCACCGCATCCCCAGCATGCCTGCTATTGTCTTCCCAATCCT  
CCCCCTTGCTGTCCTGCCCCACCCACCCCCAGAATAGAATGACACCTACTCAGACAATGCGA  
TGCAATTTCTCATTATTTATTAGGAAAGGACAGTGGGAGTGGCACCTTCCAGGGTCAAGGAAGGCA  
CGGGGGAGGGGCAAACAACAGATGGCTGGCAACTAGAAGGCACAGCTGGCCTCCCTTACTTGT  
ACAGCTCGTCCATGCCGCGGTGGAGTGGCGGCCCTCGGCGCGTTCGTAAGTGTCCACGATGG  
TGTAGTCCTCGTTGTGGGAGGTGATGTCCAACCTTGTGTCGACGATGTAGGCGCCGGGCAGCTG  
CACGGGCTTCTTGGCCTTGTAGGTGGTCTTGACCTCGGAGGTGTAGTGGCCGCGCTCCTTCAGC  
TTCAGCCTCATCTTGATCTTGCCCTTCAAGGGCGCCGTCTCGGGGTACATCCGCTCGGAGGAGG  
CCTCCCAGCCATGGTCTTCTTCTGCATTACGGGGCCGTTCGGAGGGGAAGTTGGTGCCGCGCA  
GCTTACCTTGTAGATGAACTCGCCGTCTGCAGGGAGGAGTCTGGGTACGGTCAACCACGCC  
GCCGTCTCGTAGTTCATCACGCGCTCCCACTTGAAGCCCTCGGGGAAGGACAGCTTGAAGTAG  
TCGGGGATGTCGGCGGGGTGCTTACGTAGGCCTTGGAGCCGTAGGTGAAATGAGGGGACAGG  
ATGTCCCAGGCGAAGGGCAGGGGGCCACCCTTGGTCACCTTCAGCTTAGCGGTCTGAAAGCCC  
TCGTAGGGGCGGCCCTCGCCCTCGCCCTCGATCTCGAACTCGTGGCCGTTACGGAGCCCTCC  
ATGCGCACCTTGAAGCGCATGAACTCCTTGATGATGGCCATGTTATTCTCCTCGCCCTTGCTCAC  
CATTTGTTCAATCTTTTGGTCCTCATCATTCTTTTCAACCTGTTTGGTCTTCTCATAACAGCACAGC  
ATGGTGCTAGCATAACTTCGTATAATGTATGCTATACGAAGTTATGGTAGCTGACATAACTTCGTA  
TAGCATAATTATACGAAGTTATACTAGTGCCGCCACCATGCTGTGCTGTATGAGAAGAACCAA

CAGGTTGAAAAGAATGATGAGGACCAAAGATTGAACAAATGGTGTCTAAGGGCGAAGAGCTGA  
TTAAGGAGAACATGCACATGAAGCTGTACATGGAAGGCACCGTGAACAACCACTTCAAGTG  
CACATCCGAGGGCGAAGGCAAGCCCTACGAGGGCACCCAGACCATGAGAATCAAGGTGGTCGA  
GGGCGGCCCTCTACCCTTCGCCTTCGACATCTTGGCTACCAGCTTCATGTACGGCAGCTACACC  
TTCATCAACCACACCCAGGGCATCCCCGACTTCTTTAAGCAGTCCTTCCCTGAGGGCTTCACATG  
GGAGAGAGTCACCACATACGAAGACGGGGGCGTGCTGACCGCTACCCAGGACACCAGCCTCCA  
GGACGGTTGCCTCATCTACAACGTCAAGATCAGAGGGGTGAACTTCACATCCAACGGCCCTGTG  
ATGCAGAAGAAAACACTCGGCTGGGAGGCCGGCACCGAGATGCTGTACCCCGCTGACGGCGGC  
CTGGAAGGCAGATCGGACGACGCCCTGAAGCTCGTGGGCGGGGGCCACCTGATCTGCAACTTG  
AAGAGCACATACAGATCCAAGAAACCCGCTAAGAATCTCAAGGTGCCCGGCGTCTACTATGTGG  
ACCGAAGACTGGAAAGAATCAAGGAGGCCGACAAAGAGACCTACGTGAGCAGCACGAGGTGG  
CTGTGGCCAGATACTGCGACCTCCCTAGCAAAGTGGGGCACAAGCTTAATTAGTAATTCTTGCTG  
TCCAATTTCTATTAAGGTTCTTTGTTCCCTAAGTCCAACACTAAACTGGGGGATATTATGAAG  
GGCCTTGAGCATCTGGATTCTGCCTAATAAAAAACATTTATTTTCATTGCAATGATGTATTTAAATT  
ATTTCTGAATATTTTACTAAAAAGGGAATGTGGGAGGTCAGTGCATTTAAAACATAAAGAAATGAA  
GAGCTAGTTCAAACCTTGGGAAAATACACTGGATCCCTCGAGAGATCTAGACATGATAAGATACA  
TTGATGAGTTTGGACAAACCACAAGTGAATGCAGTGAAAAAATGCTTTATTTGTGAAATTTGTG  
ATGCTATTGCTTTATTTGTAACCATTATAAGCTGCAATAACAAGTTCCGAGTTTGTGAGAAAGCA  
GACCAACAGCGGTTGGAATAATAGCGAGAACAGATTACTTGTACAGCTCGTCCATGCCGAGAG  
TGATCCCGGCGGCGGTGCGGAACTCCAGCAGGACCATGTGATCGCGCTTCTCGTTGGGGTCTTT  
GCTCAGCACGGACTGGGTGCTCAGGTAGTGGCTGTCGGGCAGCAGCACGGGGCCGTCGCCGAT  
GGGGGTGTTCTGCTGGTAGTGGTCGGCGAGCTGCACGCTGCCGTCTCCACGTTGTGGCGGAT  
CTTGAAGTTCACCTTGATGCCGTTCTTCTGCTTGACGGCCATGATATAGATGTTGTGGCTGTTGA  
AGTTGTAAGTCCAGCTTGTGCCCCAGGATGTTGCCGTCTCCTTGAAGTCGACGCCCTTCAGCTC  
GATGCGGTTACCAAGGGTGTGCGCCCTCGAACTTCACCTCGGCGCGGGTCTTGTAGGTGCCGTC  
GTCCTTGAAGAAGATGGTGCCTCCTGGACGTAGCCTTCCGGGCATGGCGGACTTGAAGAAGTCG  
TGCTGCTTCATGTGGTCGGGGTAGCGGGCGAAGCACTGCACGCCGTGGCTCAGGGTGGTCACG  
AGGGTGGGCCAGGGCACGGGCAGCTTGCCGGTGGTGCAGATGAACTTCAGGGTCAGCTTGCCG  
TTGGTGGCATCGCCCTCGCCCTCGCCCTCACGCTGAACTTGTGGCCGTTTACGTGCGCCGTCCA  
GCTCGACCAGGATGGGCACCACCCCGGTGAACAGCTCCTCGCCCTTGCTCACCATTTGTTCAAT  
CTTTTGGTCTCATCATTCTTTTCAACCTGTTTGGTCTTCTCATAACAGCACAGCATGGTATAACTT  
CGTATAATGTATGCTATACGAAGTTATTACGTACCAAGTTTAATTA 3'
